# Supplementary material
Source: Springer Nature journal article supplement (https://www.springermedizin.de/resource/supplementary/12935_2009_232_MOESM7_ESM.pdf/9540134)

**a**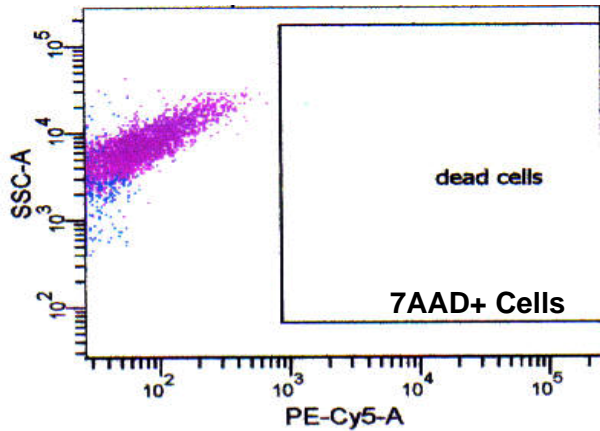**sh-miR-scramble****b**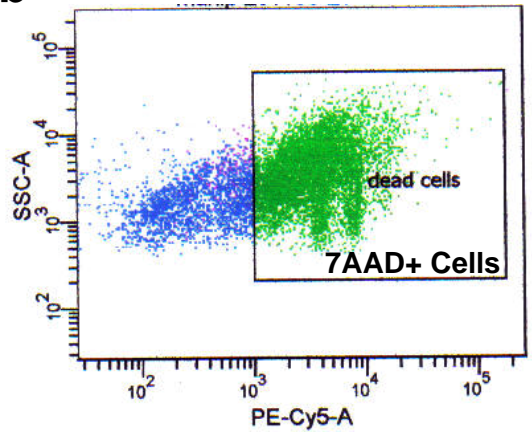**sh-miR-Aspm****c**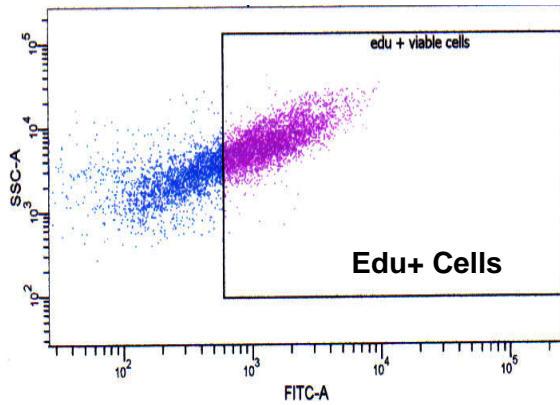**sh-miR-scramble****d**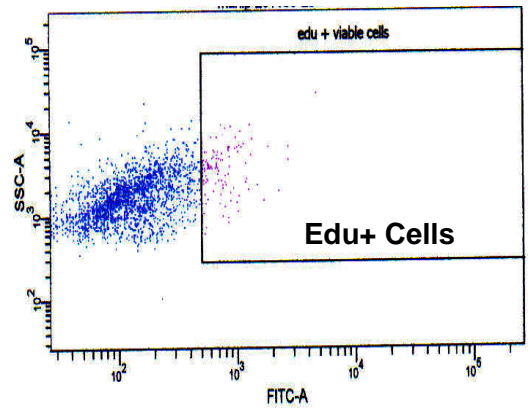**sh-miR-Aspm****GBM1**

Supplement: MOESM7 [file 9540134]
